# Supplementary material for: MacroH2A restricts inflammatory gene expression in melanoma cancer-associated fibroblasts by coordinating chromatin looping
Source: PubMed Central journal article supplement (PMC10495263; doi:10.1038/s41556-023-01208-7), 2023-08-21

CAF 5016  
 CAF 5590  
 CAF 6128  
 CAF 6977  
 CAF 7074  
 CAF 7138  
 CAF 10996  
 CAF 40  
 CAF 45  
 CAF 47  
 CAF 48  
 WT CAF (mouse)  
 $\alpha$ KO CAF (mouse)

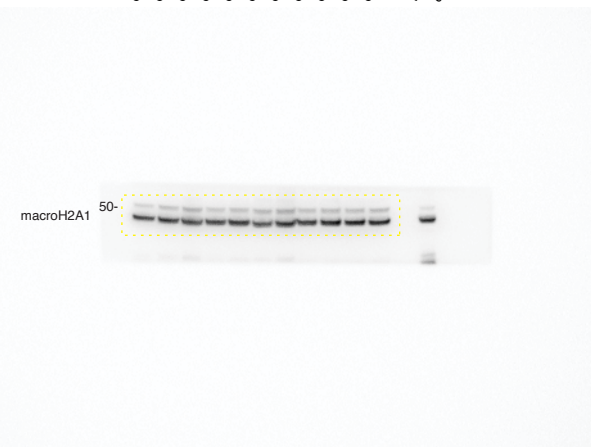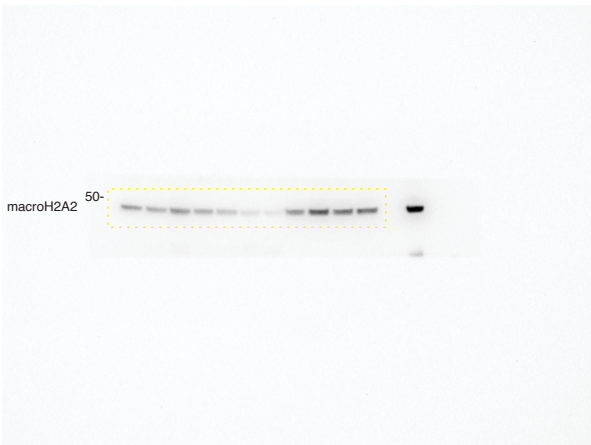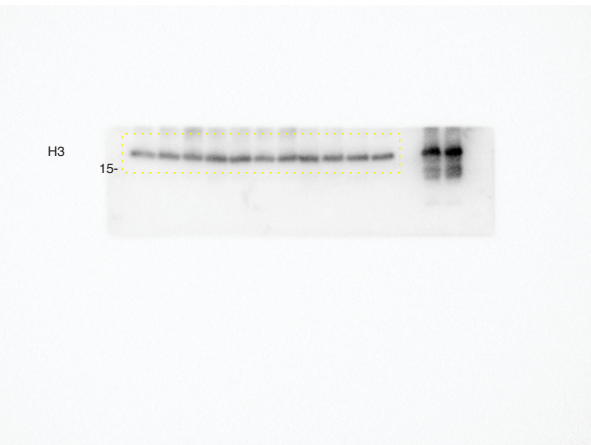

Note: total protein stain for this blot (below) not shown in main figure

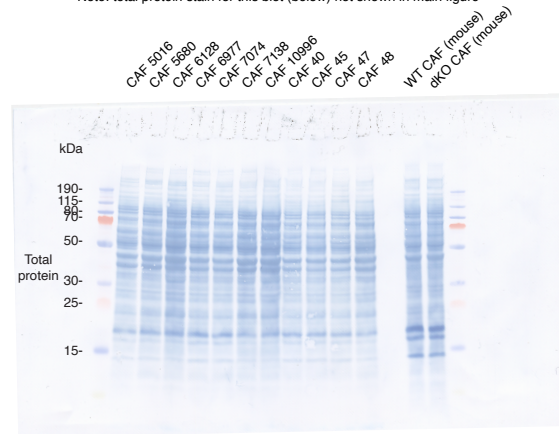

Supplement: 41556_2023_1208_MOESM16_ESM.pdf [file 41556_2023_1208_MOESM16_ESM.pdf]
