# Supplementary material for: MacroH2A restricts inflammatory gene expression in melanoma cancer-associated fibroblasts by coordinating chromatin looping
Source: PubMed Central journal article supplement (PMC10495263; doi:10.1038/s41556-023-01208-7), 2023-08-21

Source Data for Extended Data Figure 4k

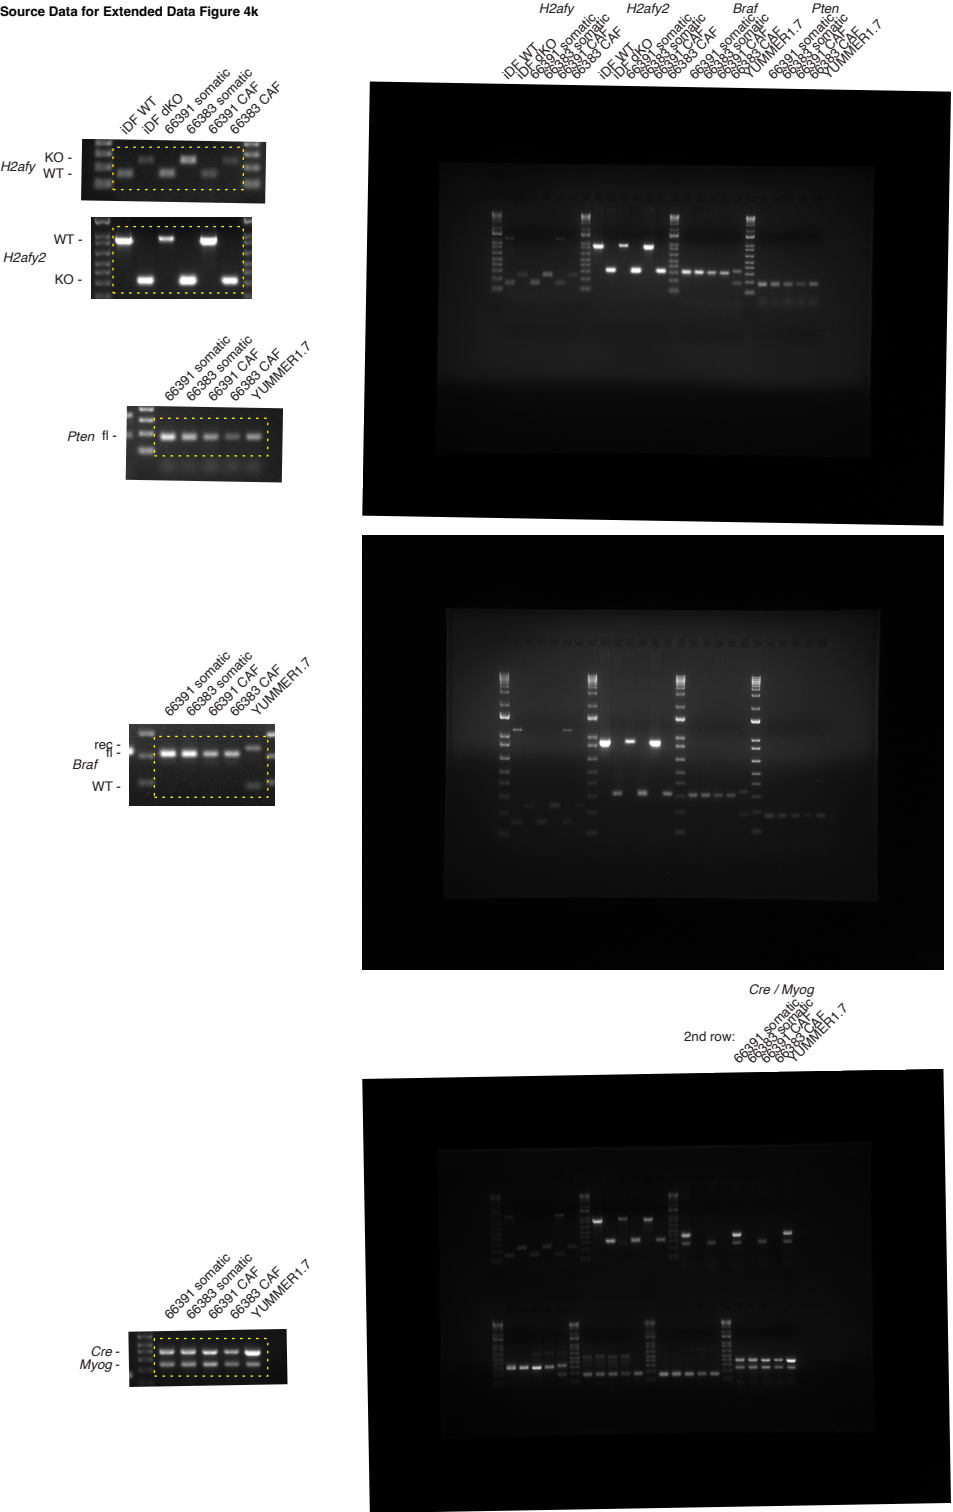

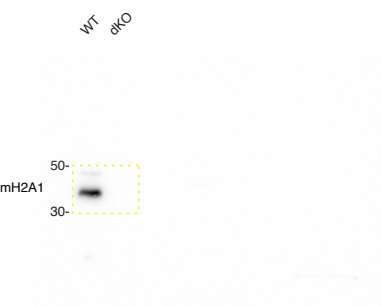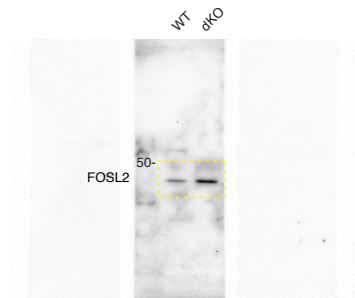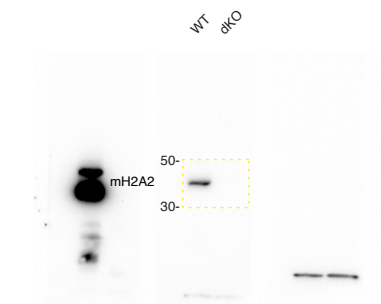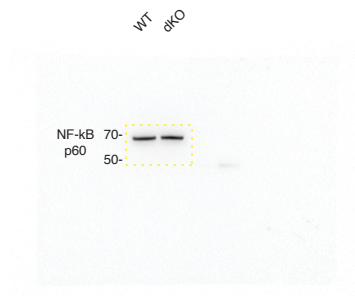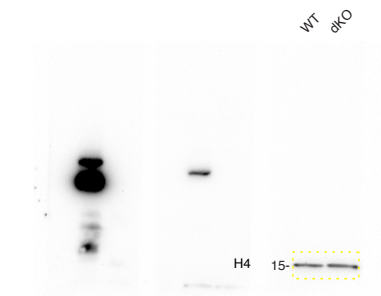

Supplement: 41556_2023_1208_MOESM23_ESM.pdf [file 41556_2023_1208_MOESM23_ESM.pdf]
