# Supplementary material for: MacroH2A restricts inflammatory gene expression in melanoma cancer-associated fibroblasts by coordinating chromatin looping
Source: PubMed Central journal article supplement (PMC10495263; doi:10.1038/s41556-023-01208-7), 2023-08-21

Source Data for Extended Data Figure 5g

CAF 5916  
CAF 5960  
CAF 5978  
CAF 5977  
CAF 7074  
CAF 10996  
CAF 45  
CAF 47  
CAF 48  
WT CAF (mouse)  
ΔKO CAF (mouse)

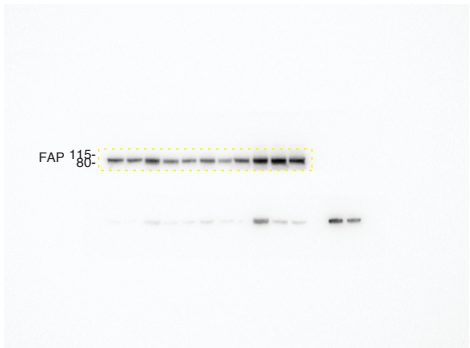

CAF 5916  
CAF 5960  
CAF 5978  
CAF 5977  
CAF 7074  
CAF 10996  
CAF 45  
CAF 47  
CAF 48  
WT CAF (mouse)  
ΔKO CAF (mouse)

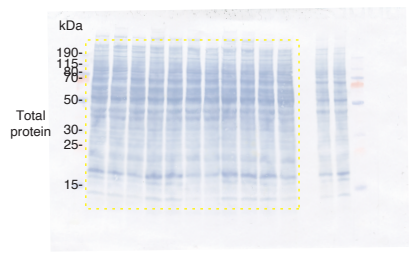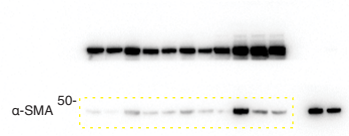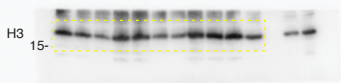

Supplement: 41556_2023_1208_MOESM25_ESM.pdf [file 41556_2023_1208_MOESM25_ESM.pdf]
